1 **[Title]**

2 Impact of Essential Genes on the Success of Genome Editing Experiments Generating 3,313  
3 New Genetically Engineered Mouse Lines

4 **[Authors]**

5 Hillary Elrick<sup>1,2</sup>, Kevin A. Peterson<sup>3</sup>, Brandon J. Willis<sup>4</sup>, Denise G. Lanza<sup>5</sup>, Elif F. Acar<sup>1,2,6,7</sup>, Edward  
6 J. Ryder<sup>8,18</sup>, Lydia Teboul<sup>9</sup>, Petr Kasperek<sup>10,19</sup>, Marie-Christine Birling<sup>11</sup>, David J. Adams<sup>8</sup>, Allan  
7 Bradley<sup>8,20</sup>, Robert E. Braun<sup>3</sup>, Steve D. Brown<sup>9</sup>, Adam Caulder<sup>9</sup>, Gemma F. Codner<sup>9,21</sup>, Francesco  
8 J. DeMayo<sup>12,22</sup>, Mary E. Dickinson<sup>13</sup>, Brendan Doe<sup>8,23</sup>, Graham Duddy<sup>8,23</sup>, Marina Gertsenstein<sup>1</sup>,  
9 Leslie O. Goodwin<sup>3</sup>, Yann Héroult<sup>11</sup>, Lauri G. Lintott<sup>1,2</sup>, K. C. Kent Lloyd<sup>4,14</sup>, Isabel Lorenzo<sup>5</sup>,  
10 Matthew Mackenzie<sup>9</sup>, Ann-Marie Mallon<sup>15</sup>, Colin McKerlie<sup>2</sup>, Helen Parkinson<sup>16</sup>, Ramiro Ramirez-  
11 Solis<sup>8,24</sup>, John R. Seavitt<sup>5,25</sup>, Radislav Sedlacek<sup>10</sup>, William C. Skarnes<sup>8,26</sup>, Damien Smedley<sup>17</sup>, Sara  
12 Wells<sup>9</sup>, Jacqueline K. White<sup>3</sup>, Joshua A. Wood<sup>4,25</sup>, International Mouse Phenotyping  
13 Consortium<sup>¶</sup>, Stephen A. Murray<sup>3</sup>, Jason D. Heaney<sup>5</sup>, Lauryl M. J. Nutter<sup>1,2,§</sup>

14 <sup>¶</sup>A list of authors and their affiliations appear at the end of this paper

15 <sup>§</sup>corresponding author, [lauryl.nutter@sickkids.ca](mailto:lauryl.nutter@sickkids.ca)

16

17 **[Affiliations]**

18 <sup>1</sup>The Centre for Phenogenomics, Toronto, ON, Canada, M5T 3H7

19 <sup>2</sup>The Hospital for Sick Children, Toronto, ON, Canada, M5G 1X8

20 <sup>3</sup>The Jackson Laboratory, Bar Harbor, ME, USA, 04609

21 <sup>4</sup>Mouse Biology Program, University of California-Davis, California, USA, 95618

22 <sup>5</sup>Department of Molecular and Human Genetic, Baylor College of Medicine, Houston, TX, USA,  
23 77030

24 <sup>6</sup>Department of Statistics, University of Manitoba, Winnipeg, MB, Canada, R3T 2N2

25 <sup>7</sup>Department of Statistical Sciences, University of Toronto, Toronto, ON, Canada, M5G 1Z5

26 <sup>8</sup>Wellcome Sanger Institute, Wellcome Genome Campus, Hinxton, Cambridge, CB10 1SA, UK

27 <sup>9</sup>The Mary Lyon Centre, MRC Harwell Institute, Harwell Campus, Didcot, Oxon, OX11 0RD, UK

28 <sup>10</sup>Czech Centre for Phenogenomics, Institute of Molecular Genetics of the Czech Academy of  
29 Sciences, Vestec, Czech Republic

30 <sup>11</sup>Université de Strasbourg, CNRS, INSERM, CELPHEDIA, PHENOMIN, Institut Clinique de la  
31 Souris, Illkirch-Graffenstaden, France

32 <sup>12</sup>Department of Molecular and Cellular Biology, Baylor College of Medicine, Houston, TX, USA,  
33 77030

34 <sup>13</sup>Department of Integrative Physiology, Baylor College of Medicine, Houston, TX, USA, 77030

35 <sup>14</sup>Department of Surgery, School of Medicine, University of California Davis, California, USA,  
36 95618

37 <sup>15</sup>MRC Harwell Institute, Harwell OX11 0RD, UK

38 <sup>16</sup>European Molecular Biology Laboratory-European Bioinformatics Institute, Wellcome  
39 Genome Campus, Hinxton, UK

40 <sup>17</sup>William Harvey Research Institute, Queen Mary University of London, London, EC1M 6BQ, UK

41 <sup>18</sup>Present address: LGC Assure, Fordham, CB7 5WW, UK

42 <sup>19</sup>Present Address: Program in Craniofacial Biology and Department of Orofacial Sciences,  
43 University of California, San Francisco, San Francisco, CA, USA

44 <sup>20</sup>Present address: Wellcome-MRC Cambridge Stem Cell Institute, University of Cambridge,

45 Trinity Lane, Cambridge, CB2 1TN, UK

46 <sup>21</sup>Present address: Nuffield Department of Population Health, University of Oxford, Oxford, OX3

47 7LF, UK

48 <sup>22</sup>Present Address: Reproductive and Developmental Biology Laboratory, NIEHS, Research

49 Triangle Park, NC, USA, 27709

50 <sup>23</sup>Present Address: The Francis Crick Institute, 1 Midland Rd, London NW1 1AT, UK

51 <sup>24</sup>Present Address: UT Health San Antonio, San Antonio, TX, USA, 78229

52 <sup>25</sup>Present Address: The Jackson Laboratory, Bar Harbor, ME, USA, 04609

53 <sup>26</sup>Present Address: The Jackson Laboratory for Genomic Medicine, Farmington, CT, USA, 06032

54

55 **Abstract**

56 The International Mouse Phenotyping Consortium (IMPC) systematically produces and  
57 phenotypes mouse lines with presumptive null mutations to provide insight into gene function.  
58 The IMPC now uses the programmable RNA-guided nuclease Cas9 for its increased capacity and  
59 flexibility to efficiently generate null alleles in the C57BL/6N strain. In addition to being a  
60 valuable novel and accessible research resource, the production of 3,313 knockout mouse lines  
61 using comparable protocols provides a rich dataset to analyze experimental and biological  
62 variables affecting *in vivo* gene engineering with Cas9. Mouse line production has two critical  
63 steps – generation of founders with the desired allele and germline transmission (GLT) of that  
64 allele from founders to offspring. A systematic evaluation of the variables impacting success  
65 rates identified gene essentiality as the primary factor influencing successful production of null  
66 alleles. Collectively, our findings provide best practice recommendations for using Cas9 to  
67 generate alleles in mouse essential genes, many of which are orthologs of genes linked to  
68 human disease.

69

70 **Introduction**

71 The International Mouse Phenotyping Consortium (IMPC) systematically generates and  
72 phenotypes mouse lines harboring null mutations in protein-coding genes and prioritizes  
73 mouse-human orthologs<sup>1,2</sup>. To produce the majority of its null alleles, the IMPC implemented a  
74 deletion strategy to remove a critical region (one or more exons shared by all annotated full-  
75 length transcripts that when removed will introduce a frameshift and premature termination  
76 codon)<sup>3</sup>. Designs were intended to target protein-coding transcripts for nonsense-mediated

77 decay by introducing a premature termination codon >50-55 nt from the final splice acceptor<sup>4</sup>.  
78 While frameshifts can be achieved using single Cas9-mediated double-strand breaks repaired  
79 by non-homologous end joining to introduce small insertions or deletions (indels), exon  
80 skipping during splicing can restore the reading frame and partial gene function<sup>5-7</sup>. The deletion  
81 approach mitigates the risk of restoring frame, simplifies founder screening, genotyping, and  
82 quality control (QC), and resembles the embryonic stem cell-based approaches used for  
83 decades to produce null alleles, albeit without selection cassette insertion. To evaluate  
84 variables affecting mutant mouse production, we analysed data from 4,874 production  
85 attempts on 3,973 unique genes from eight different centres (**Supplementary Table 1**)  
86 recorded in the IMPC's production tracking database (GenTaR, formerly iMITS; downloaded  
87 2020 Oct 11, [www.gentar.org/tracker/#/](http://www.gentar.org/tracker/#/)). Experimental parameters as well as genomic and  
88 biological characteristics of targeted genes were evaluated for their effects on mouse line  
89 production success.

90

## 91 **Results**

### 92 *Experimental parameters affecting mouse line production*

93 Four experimental parameters were assessed for their effects on success: Cas9 delivery  
94 method, number of guide RNAs (gRNAs) used, deletion size, and number of founders selected  
95 for breeding. We also evaluated the effect of changing parameters in repeated production  
96 attempts. Null deletion alleles were generated using Cas9 with guides flanking a critical region  
97 containing one or more critical exons<sup>3</sup>. Gene editing reagents were delivered by microinjection  
98 (pronuclear or cytoplasmic)<sup>8,9</sup> or electroporation<sup>10-13</sup> to target specific genes in C57BL/6N

99 zygotes (**Supplementary Fig. 1**). Among unique gene production attempts (*i.e.*, each gene  
100 represented only once; **Supplementary Table 2**), the founder rate, measured as the ratio of  
101 founders obtained to the number of embryos treated and transferred, was significantly higher  
102 using either cytoplasmic injection or electroporation compared to pronuclear injection of  
103 zygotes (**Fig. 1a**;  $p < 2.22 \times 10^{-16}$ , Wilcoxon rank sum test) with no difference between  
104 cytoplasmic injection and electroporation (**Fig. 1a**;  $p=0.26$ ). When we excluded experiments  
105 from which no founders were produced, GLT rates by these three delivery methods were all  
106 greater than 95% (95.4%, 96.5% and 97.3%, respectively) with no significant difference  
107 between them ( $p > 0.15$  in pairwise comparisons with Pearson chi-square).

108

109 To mitigate the potential risk of low activity or inactive Cas9-guide combinations, several  
110 experiments used four guides, two 5' and two 3' flanking the target site. There was no  
111 difference in founder rate production (**Fig. 1b**;  $p=0.82$  Wilcoxon rank sum test) or GLT rates of  
112 genes edited with two or four guides (GLT 96.8% and 95.7%, respectively,  $p=0.096$  Pearson chi-  
113 square). Even with no apparent efficiency gain using additional guides, it is possible that some  
114 guides may perform better than others *in vivo* and that inactive or low activity guides may  
115 contribute to experimental failure. Using two guides instead of three for four may reduce the  
116 small risk of off-target mutagenesis<sup>14-17</sup>.

117

118 To determine if the size of the deleted region influenced success, we partitioned the expected  
119 deletion size defined by the maximum distance between flanking guides into six bins with  
120 approximately equal numbers of deletion attempts and observed no significant difference in

121 founder rates ( $p=0.34$ , Kruskal-Wallis test for comparing medians of six groups; **Fig. 1c**) or GLT  
122 rates ( $p=0.668$  Kruskal-Wallis test; data not shown) for deletion sizes below 1,400 bp. The  
123 relatively small number of attempts that attempted to delete segments longer than 1,400 bp  
124 precludes conclusive statistical analysis of deletions above that size using this dataset, however  
125 decreased efficiency with increased deletion size has been reported<sup>18</sup>.

126

127 We next assessed whether the number of founders bred affected GLT rate. GLT breeding  
128 founders, regardless of production methods used, resulted in efficient germline editing and  
129 breeding a single founder provided a >95% chance of success. The overall high GLT rate was  
130 marginally improved by breeding up to three founders, but there was no advantage to breeding  
131 more than three founders (**Fig. 1d**).

132

133 While nearly 70% of first Cas9 production attempts were successful, we wanted to understand  
134 why 30% of Cas9 production attempts failed to produce GLT of the desired null allele. Many of  
135 these experiments were repeated (with or without changing parameters) and only 26.3% of  
136 second attempts and 16.5% of third attempts were successful (**Fig. 2a, Supplementary Table 3**).

137 We analysed the set of repeated attempts for 401 genes to determine what, if any, changes to  
138 experimental parameters improved success rates. We compared success rates of consecutive  
139 attempts for each gene with repeated attempts to test an association between GLT and each of  
140 four experimental parameters (delivery method, number of guides, guide sequence, targeted  
141 exon(s)). Changing at least one guide sequence, irrespective of whether the critical region  
142 targeted changed, showed a statistically significant improvement in GLT rates (54% with no

143 change to guide sequence *cf.* 68.8% with a changed guide sequence,  $p=0.01$  chi-square; **Fig.**  
144 **2b**). Changes to other parameters did not significantly affect success rates. A logistic regression  
145 model for GLT status conditional on changes in experimental factors also revealed that only  
146 changing the guide sequence improved GLT rates ( $p=0.048$ , **Table 1**). To evaluate whether these  
147 experimental factors interacted to affect GLT rates, we fit an elastic net logistic regression  
148 model which performs variable selection and accounts for collinearity through penalization.  
149 These regression models provided a 57.58% classification accuracy for GLT status which is only  
150 slightly better than a random guess, thus interactions among different parameters could not  
151 predict improved experimental success. Therefore, when experiments fail, a significant  
152 decrease in success rates after the first attempt should be expected, but changing the guide  
153 sequence may improve the likelihood of generating the desired allele compared to making no  
154 changes or changing the other parameters examined.

155

#### 156 *Biological parameters affecting successful mouse line production*

157 In considering biological variables that could influence founder and GLT rates, we hypothesized  
158 that targeting essential genes (genes whose function are necessary for cell or animal viability<sup>19</sup>)  
159 could negatively affect founder rates due to the high mutagenic efficiency of Cas9. In support of  
160 this, the founder rate obtained for cellular non-essential genes was significantly higher than for  
161 cellular essential genes ( $p < 2 \times 10^{-16}$  Wilcoxon rank sum test; **Fig. 3a**). Knockout mouse lines  
162 (genes for which knockout alleles were successfully produced) were assessed for homozygous  
163 viability of the targeted allele by the IMPC<sup>20</sup>. Alleles identified as homozygous lethal after  
164 production, so called lethal genes which include both cellular and developmental essential



165 genes<sup>19</sup>, had significantly lower founder rates than alleles of non-lethal genes ( $p=2.2 \times 10^{-11}$   
166 Wilcoxon rank sum test; **Fig. 3b**). Similarly, the birth rates for essential and lethal genes during  
167 founder production attempts were lower than that for non-essential and non-lethal genes  
168 (**Supplementary Fig. 2**). Lower birth rates may reflect a loss of mutant embryos during  
169 gestation or shortly after birth due to effects of the introduced mutation. When repeated  
170 attempts were classified by gene essentiality<sup>19</sup> 72.2% of first attempts were successful for  
171 cellular non-essential genes compared to 52.6% for cellular essential genes (**Fig. 3c**). In addition,  
172 a larger percentage of cellular non-essential genes than essential genes were successful for  
173 each subsequent attempt, albeit with decreased success rates for each subsequent attempt for  
174 the same gene.

175

176 There was a small, but not statistically significant, difference in GLT rates between cellular non-  
177 essential and cellular essential genes (96.8% and 95.2%, respectively;  $p=0.15$  Pearson Chi-  
178 square) among experiments that generated founders. This may be a result of fewer founders  
179 obtained and therefore fewer bred for cellular essential genes compared to non-essential  
180 genes. Alternatively, this may have occurred if haplo-insufficient genes were targeted and  
181 produced mosaic founders that could not propagate mutant progeny that reached genotyping  
182 age.

183

184 To assess the influence of additional biological variables on founder and GLT rates, we applied a  
185 general linear model (GLM) to test the association of several factors including embryonic  
186 expression (GEO GSE11224)<sup>21</sup>, observed/expected loss-of-function (o/e) score, probability of

187 loss-of-function (pLI) score<sup>22</sup>, chromosome position, histone methylation and acetylation (as a  
188 proxy for chromatin accessibility), cytogenic banding (a second proxy for chromatin  
189 accessibility), and human ortholog disease annotation in the Online Mendelian Inheritance in  
190 Man (OMIM) database<sup>23</sup> (**Supplementary Table 4**). When gene essentiality was excluded from  
191 analysis, only embryonic expression was significantly associated with low founder rates (odds  
192 ratio (OR)=0.95,  $p=0.011$ ). However, when essentiality was included, it was the only predictor of  
193 experimental failure (OR=0.89,  $p=2.06 \times 10^{-11}$ ; **Fig. 3d, Table 2, Supplementary Table 5**). The  
194 proportion of essential genes in each experimental parameter grouping did not vary in a way  
195 that may have confounded the results of those analyses (**Supplementary Tables 6 and 7**).

196

197 After successful production of a founder, subsequent GLT rates were very high (**Fig. 1d**). Among  
198 74 genes for which the reason for GLT failure was readily determined the majority failed GLT  
199 because founders died before breeding, founders failed to produce progeny, or founders  
200 propagated only wild-type progeny that reached genotyping age (**Fig. 4**). The remaining genes  
201 failed primarily because the desired null allele could not be validated in N1 progeny (*e.g.*,  
202 partial deletion or no frameshift recovered). Infertile founders and transmission of only wild-  
203 type progeny might be due to founder mosaicism with only wild-type cells contributing to the  
204 germline or mutation effects on gametogenesis with only wild-type cells able to produce  
205 functional germ cells. Moreover, transmission of only wild-type alleles could indicate the  
206 presence of haplo-insufficient alleles for some genes causing mutant progeny to die before  
207 genotyping. These data support the hypothesis that a substantial subset of mutations may fail

208 GLT due to negative effects on viability or fertility and are consistent with the significant effect  
209 of gene essentiality on founder production (**Table 2**).

210

## 211 **Discussion**

212 The analysis of our large, multi-centre dataset identified several variables that affect Cas9  
213 mutagenesis success and provides the basis for recommendations for genome editing in mouse  
214 zygotes. For deletion alleles, Cas9 ribonucleoprotein (RNP) electroporation is the most  
215 accessible and scalable method, providing equivalent performance to cytoplasmic  
216 microinjection of Cas9 mRNA and gRNAs. GLT rates are high for Cas9 generated founders and  
217 there is no apparent advantage to breeding more than three founders. Most attempts are  
218 successful the first time, but for attempts that fail to produce founders, changing guide  
219 sequences may be beneficial when repeating production for a given gene. The activity of Cas9-  
220 guide RNA combinations can be assessed *in vivo* (*e.g.*, by zygote treatment, *in vitro* culture, and  
221 blastocyst genotyping<sup>24</sup>). Exploring the known biology of the gene, such as predicted effects on  
222 phenotype (*e.g.*, disease association of human ortholog), viability, and/or fertility as well as  
223 essentiality scores from publicly available sources (as in <sup>19</sup>), can assist with experimental design.  
224 Successful targeting of essential genes may require methods that promote founder  
225 heterozygosity (*e.g.*, lower Cas9 concentrations) or mosaicism (*e.g.*, delivering reagents to one  
226 blastomere of a 2-cell embryo by microinjection). In some cases, conditional alleles<sup>25,26</sup> may be  
227 required instead of constitutive knockout alleles to generate a mouse line in which homozygous  
228 loss of function may be examined in specific tissues or developmental stages.

229 The effect of cell essentiality or lethality can apply to generating lines with disease-associated  
230 variants such as single nucleotide variants. Given the high proportion of essential genes among  
231 human disease genes<sup>19,27</sup>, generating mouse models of human disease may require preserving  
232 one copy of the wild-type allele, that is producing heterozygous founders or conditional variant  
233 alleles, to establish a new mouse line. Overall, the use of Cas9 is a robust and flexible method to  
234 generate gene-edited mouse lines. Improving model production success rates by applying our  
235 recommendations can reduce the number of animals used to generate new models, consistent  
236 with the ethical principles of the 3R's<sup>28</sup>.

237 **[Materials & Methods]**

238 **Mouse strains:** All null allele mouse lines were produced in the C57BL/6N strain background  
239 available from Charles River or the Jackson Laboratory (**Supplementary Methods Table 1**). All  
240 live animal protocols conformed to the applicable standards for the ethical use of animals in  
241 research at the respective facilities with detailed ethics statements found in **Supplementary**  
242 **Methods Table 1** for each production centre. Animal welfare was regularly monitored.

243 **Allele design:** Null alleles were designed such that the mutations resulting from Cas9  
244 endonuclease activity and double-strand break (DSB) repair caused a reading frameshift in  
245 protein-coding transcripts and introduced a premature stop codon. This required the  
246 identification of a critical region for each targeted gene. A critical region was defined as one or  
247 more exons that when frameshifted or deleted resulted in a frameshift in the open reading  
248 frames of all known full-length protein-coding transcripts (per Ensembl build 38)<sup>3</sup>. For the  
249 majority of designs, the premature stop codon was predicted to be in the first half of the  
250 protein-coding open reading frame and to target transcripts for nonsense-mediated decay<sup>4,29</sup>.

251 Such alleles are considered presumptive nulls. Three major categories of alleles were evaluated  
252 in this study. Exon deletion (exdel) alleles resulting from NHEJ-mediated repair of Cas9-induced  
253 DSBs flanking the exon(s) within a gene's critical region. Intra-exon deletion (intra-exdel) alleles  
254 resulting from repair of Cas9-induced paired DSBs within a single exon in the target gene's  
255 critical region, used for example, when all exons of a gene are in the same frame precluding an  
256 exon deletion strategy or for single exon genes. Inter-exon deletion (inter-exdel) alleles  
257 resulting from repair of Cas9-induced paired DSBs in two or more different (often sequential)  
258 exons in a gene's critical region, used for example, to delete a functional domain that spans

259 multiple exons or when specific gRNAs in appropriate intron locations could not be identified.  
260 Alleles that did not result in a frameshift failed quality control (QC) metrics and were not  
261 maintained. Exceptions were made when the deletion was still in frame, but either removed  
262 critical protein domains (*e.g.*, zinc fingers from a zinc-finger protein) or a substantial fraction of  
263 the protein-coding sequence; these alleles were also deemed to be presumptive null allele.  
264 **sgRNA selection:** Guide RNA (gRNA) spacer sequences were selected using either the CRISPR  
265 design tool<sup>30</sup>, the Wellcome Sanger Genome Editing (WGE) Tool<sup>31</sup>, CRISPOR<sup>32</sup>, CRISPRTools<sup>33</sup>,  
266 CHOPCHOP<sup>34</sup>, or FORCAST<sup>35</sup>. Suitable gRNA spacer sequences were selected to minimize  
267 predicted off-target mutagenesis using specificity scores >65 when available and/or sequences  
268 with at least 3 mismatches for all predicted off-target sites. Multiple guides were used to  
269 generate deletion alleles, with either two, three, or four guides (2G, 3G, or 4G, respectively)  
270 with two or more guides flanking the target critical region. In the 3G approach, the middle  
271 guide could be within an exon and result in the deletion in conjunction with either the  
272 upstream or downstream guide, removing either the splice acceptor or donor from the critical  
273 region, resulting in mis-splicing and the introduction of a frameshift.  
274 **sgRNA synthesis:** sgRNAs were synthesized by either subcloning sgRNA spacer sequences and *in*  
275 *vitro* transcription (plasmid-IVT), PCR and *in vitro* transcription (PCR-IVT)<sup>36</sup>, gBlock synthesis and  
276 *in vitro* transcription (gBlock-IVT), or by primer extension and *in vitro* transcription (PE-IVT)<sup>36</sup>.  
277 Alternatively, sgRNAs were purchased from commercial suppliers. See **Supplementary Methods**  
278 **Table 1** for centre-specific reagent details.  
279 *PCR-IVT:* DNA templates for PCR-IVT were produced using overlapping oligonucleotides in a  
280 high-fidelity PCR reaction<sup>37</sup> or using a plasmid template (Addgene #42230<sup>38</sup>) and appropriate

281 primers<sup>36</sup>. PCR amplicons were purified using the Monarch PCR & DNA cleanup kit (New  
282 England BioLabs T1030) or the QIAQuick PCR purification kit (Qiagen 28104) and used as a  
283 template for *in vitro* transcription of the sgRNA with the T7 MEGAshortscript™ Kit  
284 (ThermoFisher AM1354).

285 *Plasmid-IVT*: Overlapping oligonucleotides with *Bsa*I appendages to facilitate standard sticky  
286 ended cloning into a T7 expression plasmid (a kind gift from Sebastian Gerety, based upon<sup>39</sup>)  
287 were purchased annealed. Alternatively, annealed oligonucleotides were cloned into plasmid  
288 DR274 (Addgene #42250<sup>40</sup>). Plasmid DNA was extracted using the QIAGEN Plasmid Plus 96 Kit  
289 (Qiagen 16181) and guide cloning confirmed by Sanger sequencing. The DNA was then  
290 linearized and used as a template for T7 RNA *in vitro* transcription using the T7  
291 MEGAshortscript™ Kit (ThermoFisher AM1354) or Thermo T7 RNA polymerase (TOYOBO, TRL-  
292 201).

293 *gBlock-IVT*: sgRNAs were synthesized directly from gBlock® DNA (Integrated DNA Technologies)  
294 templates containing the T7 promoter using the HiScribe™ T7 High Yield RNA Synthesis Kit (New  
295 England BioLabs E2050) following manufacturer's instructions for sgRNA synthesis.

296 *PE-IVT*: The EnGen sgRNA Synthesis Kit (New England BioLabs E3322) was used for PE-IVT per  
297 the kit protocol, but with incubation at 37°C for 60-90 minutes prior to DNase treatment.  
298 For some 3G and 4G designs, up to two primers (*e.g.* both upstream gRNAs or both  
299 downstream gRNAs) were pooled at appropriate final concentrations before PCR or PE-IVT.

300 After *in vitro* transcription, sgRNA was purified using the RNA Clean & Concentrator-25 (Zymo  
301 Research R1017) or the MEGAclean Transcription Clean-Up Kit (ThermoFisher AM1908). All  
302 samples were analyzed by Nanodrop to determine A260/280 and A260/230 ratios ( $\geq 1.9$  to pass

303 quality control). The integrity and size of sgRNA was assessed by agarose gel electrophoresis,  
304 Agilent Bioanalyzer, Agilent RNA Tape or the Qiaxcel Advanced System (RNA QC V2.0).  
305 Synthesized sgRNAs were stored at -80°C in elution buffer or stored as ammonium acetate  
306 precipitates in ethanol at -20°C. Before use, sgRNAs were either thawed on ice or pelleted, air  
307 dried, and resuspended in RNase-free MI buffer.

308 **Cas9:** Cas9 mRNA was purchased (**Supplementary Methods Table 1**) or transcribed in-house<sup>41</sup>.  
309 Cas9 protein was purchased from commercial suppliers. See **Supplementary Methods Table 1**  
310 for centre-specific reagent details.

311 **Injection mix preparation:** Injection mixes were prepared essentially as previously reported<sup>36</sup>  
312 with or without filtration prior to injection. For mRNA microinjection, injection mixes consisted  
313 of Cas9 mRNA and sgRNA in microinjection buffer (**Supplementary Methods Table 1**).  
314 Concentrations for each production attempt are shown in **Supplementary Table S8**. For Cas9  
315 protein microinjection, Cas9 ribnucleoprotein (RNP) complexes were produced by mixing the  
316 Cas9 protein with sgRNA at 5X the concentration shown in **Supplementary Methods Table S1** in  
317 RNP injection buffer and incubating at 37°C or room temperature for 10 minutes. The RNP mix  
318 was then diluted with 4 volumes of RNP injection buffer prior to injection. See **Supplementary**  
319 **Methods Table 1** for centre-specific reagent details.

320 **Electroporation mix preparation:** Electroporation mixes were prepared essentially as  
321 previously reported<sup>11-13,36</sup>. Electroporation mixes consisted of Cas9 protein and sgRNA in RNP  
322 electroporation buffer (**Supplementary Methods Table 1**) at 2X the concentrations shown in  
323 **Supplementary Table S8**, incubated at 37°C or room temperature for 5-15 minutes, and placed  
324 on ice until electroporation. Immediately before electroporation, RNP was diluted with an equal



325 volume of Opti-MEM (ThermoFisher 31985062). See **Supplementary Methods Table 1** for  
326 centre-specific reagent details.

327 **Generation of embryos by mating:** C57BL/6N female mice, 3-6 weeks old, were injected with 5  
328 IU/mouse of pregnant mare serum, followed 46-48 hr later with 5 IU/mouse of human  
329 chorionic gonadotropin. The females were then mated overnight with C57BL/6N males.  
330 Fertilized oocytes were collected from females with copulatory plugs the following morning at  
331 0.5 days post-coitum (dpc). Oviducts were dissected and cumulus masses from these were  
332 released and treated with hyaluronidase. Fertilized 1-cell embryos were selected and  
333 maintained at 37°C in media prior to microinjection or electroporation.

334 **Microinjection of Cas9 reagents:** The number of embryos injected and the injection route  
335 (pronuclear or cytoplasmic) for each experiment is in **Supplementary Table S8**. Pronuclear  
336 microinjections were performed following standard protocols<sup>8,42</sup>. Cytoplasmic injections were  
337 performed essentially as in<sup>9</sup>. Visible movement of the cytoplasm indicated successful injection.  
338 Injected zygotes were transferred into pseudopregnant females (see **Supplementary Methods**  
339 **Table 1**) on the afternoon of the injection or after overnight culture (recorded for each  
340 production attempt in **Supplementary Table S8**), with 12-15 or 20-28 zygotes per unilateral or  
341 bilateral transfer into pseudopregnant females, respectively.

342 **Electroporation of Cas9 reagents:** Electroporation was performed essentially as described<sup>11-</sup>  
343 <sup>13,36</sup>. At some centres, zygotes were briefly treated with Acid Tyrode's solution (Sigma-Aldrich  
344 T1788). After acid treatment, embryos were rinsed at least 3 times with the final rinse in Opti-  
345 MEM. For electroporation, embryos were transferred into a 1:1 mixture of Cas9 RNP and Opti-  
346 MEM or Opti-MEM when RNP were formed in Opti-MEM. For each production attempt,

347 electroporation pulses are in **Supplementary Table S8**. After electroporation the embryos were  
348 rinsed and transferred into pseudopregnant recipients the same day or after overnight culture  
349 (as recorded for each production attempt in **Supplementary Table S8**). Centre-specific details  
350 for buffers used are in **Supplementary Methods Table 1**.

351 **Genotyping:** Genomic DNA was prepared from ear punch or tail biopsies of two- to three-week-  
352 old pups (see **Supplementary Methods Table 1** for reagents) using commercial kits or  
353 previously described protocols<sup>43,44</sup>. DNA was amplified by standard end-point PCR or  
354 quantitative PCR (qPCR). End-point PCR assays were designed to produce differently sized  
355 amplicons. To detect wild-type alleles, one primer was designed outside of the deletion target  
356 sequence and the second primer designed within the deletion target sequence such that  
357 amplicons are only produced from wild-type alleles. To detect deletion alleles, primers were  
358 designed to flank the predicted deletion junction. Amplification can result in two amplicons – a  
359 shorter amplicon representing the deletion allele and a larger amplicon representing the wild-  
360 type allele, if PCR conditions allow the amplification of the larger amplicon. Three-primer  
361 designs use a common primer outside of the deletion for both amplicons. PCR products were  
362 visualized using the Caliper LabChip GX system, QIAxcel Advanced, or agarose gel  
363 electrophoresis. Sequences are available upon request from the relevant production centre.  
364 In some cases, gene-specific ‘loss of WT allele’ (LoA) qPCR assays were designed to the region of  
365 the genome predicted to be deleted<sup>45,46</sup>. Deletion alleles will not amplify a product at the target  
366 site such that homozygous or hemizygous X-linked male deletions would have a copy number of  
367 0, heterozygous a copy number of 1 and mosaic animals a copy number between 1 and 2 for  
368 autosomal alleles or between 0 and 1 in hemizygous X-linked alleles in males. These assays

369 allowed estimation of the level of mosaicism in founder animals. Mice showing the greatest loss  
370 of allele were selected for breeding to confirm germline transmission. Sequences for loss-of-  
371 allele assays are available upon request from the relevant production centres.

372 Once germline transmission was confirmed, mice were genotyped with either end-point PCR or  
373 probe-based LoA assays. See **Supplementary Methods Table 1** for centre-specific genotyping  
374 methods.

375 **Germline Transmission Test Breeding:** Founders born from microinjection or electroporation  
376 experiments that carried the desired allele based on genotyping results were pair-mated to  
377 C57BL/6N mice. N1 pups were screened with the same genotyping assay used to identify  
378 founders. Deletion amplicons from deletion-positive N1 mice were subjected to Sanger  
379 sequencing (with or without subcloning) and other occasionally other quality control measures.

380 **Copy number assessment:** When warranted, to assess whether the excised genomic fragment  
381 from deletion alleles re-inserted into the genome, DNA from N1 mice was purified using the  
382 NucleoSpin Tissue Kit (Machery-Nagel 740453) and subjected to digital droplet PCR (ddPCR) at  
383 The Centre for Applied Genomics (Toronto, Canada), the Mary Lyon Centre (Didcot, UK), or the  
384 Mouse Biology Program (University of California, Davis). The ddPCR assays were designed such  
385 that the amplification primers and probes were entirely contained within the target deletion  
386 fragment. For heterozygous N1 mice, a copy number equal to 1 (+/-0.2) was considered a pass;  
387 for hemizygous X-linked male mice, a copy number of 0 to 0.2 was considered a pass.

388 **Data download and filtering:** A complete data set of Cas9-mediated mouse production  
389 attempts was downloaded on October 11, 2020 from the International Mouse Phenotyping  
390 Consortium production tracking database (formerly iMITS and now GenTaR; 'Cas9 Micro-

391 Injection Excel download’). This data included all Cas9-based production attempts as of that  
392 date. A production attempt was defined as the treatment of embryos to introduce Cas9 and  
393 guide RNAs to direct genome editing, subsequent embryo transfer, birth and screening of pups  
394 born from the embryo transfer, and subsequent breeding of mutant founders to obtain  
395 germline transmission of the desired edited allele. The data was filtered to remove attempts  
396 labeled as “private”, as “experimental”, or producing an allele other than a null allele, those  
397 with a status “Microinjection in Progress”, embryo transfer day of “Next Day”, none or >1000  
398 embryos injected, incomplete information (e.g. number of founders not set, incomplete quality  
399 control information), and/or attempts that targeted non-protein coding genes. These data were  
400 further limited to attempts from production centres that had reported germline transmission  
401 for at least 50 unique genes for each of one or more of the analyzed methods (Cas9 mRNA  
402 pronuclear microinjection, Cas9 mRNA cytoplasmic injection, Cas9 RNP electroporation). This  
403 comprised the complete data set for analysis (**Supplementary Table 8**).

404 To define the set of unique gene experiments (i.e., each gene represented only once in the data  
405 set), the earliest attempt with germline transmission of the desired allele (Status = Genotype  
406 confirmed) for successful genes or the latest unsuccessful attempt (Status = Micro-injection  
407 aborted) was kept so that each gene was represented by a single attempt. If all attempts had a  
408 status of "Founder obtained", the most recent was kept. However, if no attempts for a given  
409 gene were successful in this filtered dataset, the larger IMPC dataset was queried to see if a  
410 successful attempt existed in the pre-filtered dataset (e.g., at another IMPC production centre  
411 or as the result of technology development activities at a given centre). Successful production  
412 at another centre or through technology development activities could have resulted in aborting

413 the production attempt in our filtered dataset, rather than failure of a complete experiment, or  
414 that technical issues rather than the parameters studied here resulted in failure, so these  
415 attempts were excluded from analysis.

416 For repeat attempt analysis, all attempts at the same production centre for genes that had  
417 more than one attempt were identified. This data set was then filtered to remove attempts in  
418 progress (Status = “Microinjection in progress” or “Founders obtained”). The remaining  
419 attempts were sorted in chronological order by microinjection [electroporation] date. If the first  
420 attempt for a given gene was successful, the set of attempts for that gene was removed from  
421 the repeat attempt analysis. Similarly, if an attempt was aborted within 6 weeks of a successful  
422 germline transmission attempt, it was removed since it may have been aborted because  
423 germline transmission had already been obtained, rather than having “failed”. Finally, if there  
424 was no GLT in any attempt at one centre, but successful GLT at another centre, the set of failed  
425 attempts was removed from the repeat dataset. The resulting data set comprised the repeat  
426 dataset (**Supplementary Table 3**).

427 **Data Annotation:** Genes targeted for mouse line production attempts in **Supplementary Table**  
428 **2** were annotated with derived parameters including bins for Cas9 mRNA and protein  
429 concentration, gRNA cut sites and predicted deletion sizes, percentage of embryos that  
430 survived to transfer of those treated (injected or electroporated), birth rate (number of pups  
431 born divided by embryos transferred), founder rate (number of founders born divided by  
432 embryos transferred), number of founders selected for breeding. Repeat attempts  
433 (**Supplementary Table 3**) were annotated with whether the Cas9 type (mRNA vs. protein),  
434 amount of Cas9, delivery of reagents (injection versus electroporation), or gRNA locations

435 (sequences) changed between sequential attempts. All filtering and annotation of the data was  
436 performed in Python3.8.5 using packages numPy1.2.1<sup>47</sup> and pandas1.2.2<sup>48</sup>.  
437 Genes for each attempt were annotated (**Supplementary Table 4**) with their viability (as  
438 annotated at the IMPC – viable or homozygous lethal), human orthologs and cell essentiality of  
439 human orthologous genes<sup>19</sup>, embryonic expression (GEO GSE11224)<sup>21</sup>, length, GC content,  
440 number of CpG sites, and CpG percentage (**Supplementary Table 2**). The human orthologs'  
441 probability of being loss-of-function intolerant (pLI) and observed / expected (oe) mutation rate  
442 was retrieved from gnomAD<sup>22</sup>. Additional annotations were added for analysis of biological  
443 variables affecting success. Annotation details are in **Supplementary Table 2**.  
444 **Statistical Analysis:** The primary outcomes were the founder rate and the germline  
445 transmission status. The founder rate had a right-skewed distribution with a range [0,0.5].  
446 Hence, comparisons of the founder rate across different categories of biological or  
447 experimental factors were conducted using nonparametric tests. For pairwise comparisons, the  
448 Wilcoxon rank sum test<sup>49</sup> was used and when there were more than two categories the Kruskal-  
449 Wallis test<sup>50</sup> was employed. The biological factors considered in the comparisons were the gene  
450 essentiality (essential versus non-essential) and gene lethality (lethal versus non-lethal). The  
451 experimental factors were the delivery method (three categories), number of gRNAs used (2  
452 versus 4), deletion size (six categories), and number of founders selected for breeding (four  
453 categories). Since the GLT status is binary (yes versus no), comparisons of the GLT rate  
454 (proportion of genes with GLT) across different categories of biological or experimental factors  
455 were performed using the Pearson chi-square test<sup>51</sup>. In the case of multiple pairwise  
456 comparisons, correction for multiple testing was done using Holm's method<sup>52</sup>. Evaluation of

457 success of repeated attempts was based on descriptive summaries, mainly calculation of  
458 relevant proportions. The assessment of the impact of changing experimental factors to the  
459 success of gene editing in repeated attempts was conducted using logistic regression with the  
460 GLT status as the binary response and changes in the delivery method (change versus no  
461 change), number of gRNAs used (decrease, no change, increase), deletion size (change versus  
462 no change) and number of founders selected for breeding (change versus no change) as  
463 categorical covariates. All statistical analyses were performed using the R statistical programming  
464 software<sup>53</sup>, along with the packages `ggplot2`<sup>54</sup> for figures, `tidyverse`<sup>55</sup> for data  
465 manipulations and `effects`<sup>56,57</sup> for effect plots.  
466 The general linear models of biological variables were fit using the `glm` function in the R 3.6.2  
467 native stats package (<https://rdocumentation.org/packages/stats/versions/3.6.2>) using the  
468 factors in **Supplementary Table 4** and with founder rate as the dependent variable.  
469 All code can be found at [https://github.com/The-Centre-for-Phenogenomics/IMPC-Cas9-](https://github.com/The-Centre-for-Phenogenomics/IMPC-Cas9-Production)  
470 [Production](https://github.com/The-Centre-for-Phenogenomics/IMPC-Cas9-Production).

471

## 472 References

473

- 474 1 Lloyd, K. C. K. *et al.* The Deep Genome Project. *Genome Biol* **21**, 18, doi:10.1186/s13059-  
475 020-1931-9 (2020).
- 476 2 Birling, M. C. *et al.* A resource of targeted mutant mouse lines for 5,061 genes. *Nat Genet*  
477 **53**, 416-419, doi:10.1038/s41588-021-00825-y (2021).
- 478 3 Bradley, A. *et al.* The mammalian gene function resource: the international knockout  
479 mouse consortium. *Mamm Genome* **23**, 580-586, doi:10.1007/s00335-012-9422-2 (2012).

- 480 4 Popp, M. W. & Maquat, L. E. The dharma of nonsense-mediated mRNA decay in  
481 mammalian cells. *Mol Cells* **37**, 1-8, doi:10.14348/molcells.2014.2193 (2014).
- 482 5 Smits, A. H. *et al.* Biological plasticity rescues target activity in CRISPR knock outs. *Nat*  
483 *Methods* **16**, 1087-1093, doi:10.1038/s41592-019-0614-5 (2019).
- 484 6 Lalonde, S. *et al.* Frameshift indels introduced by genome editing can lead to in-frame exon  
485 skipping. *PLoS One* **12**, e0178700, doi:10.1371/journal.pone.0178700 (2017).
- 486 7 Mou, H. *et al.* CRISPR/Cas9-mediated genome editing induces exon skipping by alternative  
487 splicing or exon deletion. *Genome Biol* **18**, 108, doi:10.1186/s13059-017-1237-8 (2017).
- 488 8 Behringer, R. R., Gertsenstein, M., Nagy, K. & Nagy, A. *Manipulating the Mouse Embryo: A*  
489 *Laboratory Manual*. 4th edn, (Cold Spring Harbor Laboratory Press, 2014).
- 490 9 Doe, B., Brown, E. & Boroviak, K. Generating CRISPR/Cas9-Derived Mutant Mice by Zygote  
491 Cytoplasmic Injection Using an Automatic Microinjector. *Methods Protoc* **1**,  
492 doi:10.3390/mps1010005 (2018).
- 493 10 Gertsenstein, M. & Nutter, L. M. J. Production of knockout mouse lines with Cas9. *Methods*  
494 **191**, 32-43, doi:10.1016/j.ymeth.2021.01.005 (2021).
- 495 11 Wang, W. *et al.* Delivery of Cas9 Protein into Mouse Zygotes through a Series of  
496 Electroporation Dramatically Increases the Efficiency of Model Creation. *Journal of genetics*  
497 *and genomics = Yi chuan xue bao* **43**, 319-327, doi:10.1016/j.jgg.2016.02.004 (2016).
- 498 12 Kaneko, T., Sakuma, T., Yamamoto, T. & Mashimo, T. Simple knockout by electroporation of  
499 engineered endonucleases into intact rat embryos. *Scientific reports* **4**, 6382,  
500 doi:10.1038/srep06382 (2014).



- 501 13 Modzelewski, A. J. *et al.* Efficient mouse genome engineering by CRISPR-EZ technology. *Nat*  
502 *Protoc* **13**, 1253-1274, doi:10.1038/nprot.2018.012 (2018).
- 503 14 Peterson, K. A. *et al.* Whole genome analysis for 163 gRNAs in Cas9-edited mice reveals  
504 minimal off-target activity. *Commun Biol* **6**, 626, doi:10.1038/s42003-023-04974-0 (2023).
- 505 15 Iyer, V. *et al.* Off-target mutations are rare in Cas9-modified mice. *Nat Methods* **12**, 479,  
506 doi:10.1038/nmeth.3408 (2015).
- 507 16 Anderson, K. R. *et al.* CRISPR off-target analysis in genetically engineered rats and mice. *Nat*  
508 *Methods* **15**, 512-514, doi:10.1038/s41592-018-0011-5 (2018).
- 509 17 Willi, M., Smith, H. E., Wang, C., Liu, C. & Hennighausen, L. Mutation frequency is not  
510 increased in CRISPR-Cas9-edited mice. *Nat Methods* **15**, 756-758, doi:10.1038/s41592-018-  
511 0148-2 (2018).
- 512 18 Lanza, D. G. *et al.* Comparative analysis of single-stranded DNA donors to generate  
513 conditional null mouse alleles. *BMC biology* **16**, 69, doi:10.1186/s12915-018-0529-0 (2018).
- 514 19 Cacheiro, P. *et al.* Human and mouse essentiality screens as a resource for disease gene  
515 discovery. *Nature communications* **11**, 655, doi:10.1038/s41467-020-14284-2 (2020).
- 516 20 Ring, N. *et al.* A mouse informatics platform for phenotypic and translational discovery.  
517 *Mamm Genome* **26**, 413-421, doi:10.1007/s00335-015-9599-2 (2015).
- 518 21 Barrett, T. *et al.* NCBI GEO: archive for functional genomics data sets--update. *Nucleic Acids*  
519 *Res* **41**, D991-995, doi:10.1093/nar/gks1193 (2013).
- 520 22 Karczewski, K. J. *et al.* The mutational constraint spectrum quantified from variation in  
521 141,456 humans. *Nature* **581**, 434-443, doi:10.1038/s41586-020-2308-7 (2020).

- 522 23 (McKusick-Nathans Institute of Genetic Medicine, Johns Hopkins University (Baltimore,  
523 MD), 2020).
- 524 24 Scavizzi, F. *et al.* Blastocyst genotyping for quality control of mouse mutant archives: an  
525 ethical and economical approach. *Transgenic Res* **24**, 921-927, doi:10.1007/s11248-015-  
526 9897-1 (2015).
- 527 25 Economides, A. N. *et al.* Conditionals by inversion provide a universal method for the  
528 generation of conditional alleles. *Proc Natl Acad Sci U S A* **110**, E3179-3188,  
529 doi:10.1073/pnas.1217812110 (2013).
- 530 26 Nagy, A. Cre recombinase: the universal reagent for genome tailoring. *Genesis* **26**, 99-109,  
531 doi:10.1002/(SICI)1526-968X(200002)26:2<99::AID-GENE1>3.0.CO;2-B [pii] (2000).
- 532 27 Cacheiro, P. *et al.* Mendelian gene identification through mouse embryo viability screening.  
533 *Genome Med* **14**, 119, doi:10.1186/s13073-022-01118-7 (2022).
- 534 28 Russell, W. M. S. & Burch, R. L. *The Principles of Humane Experimental Technique*.  
535 (Methuen, 1959).
- 536 29 Popp, M. W. & Maquat, L. E. Organizing principles of mammalian nonsense-mediated  
537 mRNA decay. *Annu Rev Genet* **47**, 139-165, doi:10.1146/annurev-genet-111212-133424  
538 (2013).
- 539 30 Ran, F. A. *et al.* Genome engineering using the CRISPR-Cas9 system. *Nat Protoc* **8**, 2281-  
540 2308, doi:10.1038/nprot.2013.143 (2013).
- 541 31 Hodgkins, A. *et al.* WGE: a CRISPR database for genome engineering. *Bioinformatics* **31**,  
542 3078-3080, doi:10.1093/bioinformatics/btv308 (2015).

- 543 32 Haeussler, M. *et al.* Evaluation of off-target and on-target scoring algorithms and  
544 integration into the guide RNA selection tool CRISPOR. *Genome Biol* **17**, 148,  
545 doi:10.1186/s13059-016-1012-2 (2016).
- 546 33 Peterson, K. A. *et al.* CRISPRtools: a flexible computational platform for performing  
547 CRISPR/Cas9 experiments in the mouse. *Mamm Genome* **28**, 283-290, doi:10.1007/s00335-  
548 017-9681-z (2017).
- 549 34 Labun, K., Montague, T. G., Gagnon, J. A., Thyme, S. B. & Valen, E. CHOPCHOP v2: a web  
550 tool for the next generation of CRISPR genome engineering. *Nucleic Acids Res* **44**, W272-  
551 276, doi:10.1093/nar/gkw398 (2016).
- 552 35 Elrick, H. *et al.* FORCAST: a fully integrated and open source pipeline to design Cas-  
553 mediated mutagenesis experiments. *bioRxiv*, 2020.2004.2021.053090,  
554 doi:10.1101/2020.04.21.053090 (2020).
- 555 36 Gertsenstein, M. & Nutter, L. M. J. Engineering point mutant and epitope-tagged alleles in  
556 mice using Cas9 RNA-guided nuclease. *Curr Protoc Mouse Biol* **8**, 28-53,  
557 doi:10.1002/cpmo.40 (2018).
- 558 37 Bassett, A. R., Tibbit, C., Ponting, C. P. & Liu, J. L. Highly efficient targeted mutagenesis of  
559 *Drosophila* with the CRISPR/Cas9 system. *Cell reports* **4**, 220-228,  
560 doi:10.1016/j.celrep.2013.06.020 (2013).
- 561 38 Cong, L. *et al.* Multiplex genome engineering using CRISPR/Cas systems. *Science* **339**, 819-  
562 823, doi:10.1126/science.1231143 (2013).
- 563 39 Mali, P. *et al.* RNA-guided human genome engineering via Cas9. *Science* **339**, 823-826,  
564 doi:10.1126/science.1232033 (2013).

- 565 40 Hwang, W. Y. *et al.* Efficient genome editing in zebrafish using a CRISPR-Cas system. *Nat*  
566 *Biotechnol* **31**, 227-229, doi:10.1038/nbt.2501 (2013).
- 567 41 Mianne, J. *et al.* Correction of the auditory phenotype in C57BL/6N mice via CRISPR/Cas9-  
568 mediated homology directed repair. *Genome Med* **8**, 16, doi:10.1186/s13073-016-0273-4  
569 (2016).
- 570 42 Gardiner, W. J. & Teboul, L. Overexpression transgenesis in mouse: pronuclear injection.  
571 *Methods Mol Biol* **561**, 111-126, doi:10.1007/978-1-60327-019-9\_8 (2009).
- 572 43 Truett, G. E. *et al.* Preparation of PCR-quality mouse genomic DNA with hot sodium  
573 hydroxide and tris (HotSHOT). *Biotechniques* **29**, 52, 54, doi:10.2144/00291bm09 (2000).
- 574 44 Green, M. R. & Sambrook, J. *Molecular Cloning: A Laboratory Manual*. Vol. 3 (Cold Spring  
575 Harbor Laboratory Press, 2012).
- 576 45 Ryder, E. *et al.* Molecular characterization of mutant mouse strains generated from the  
577 EUCOMM/KOMP-CSD ES cell resource. *Mamm Genome* **24**, 286-294, doi:10.1007/s00335-  
578 013-9467-x (2013).
- 579 46 Mianne, J. *et al.* Analysing the outcome of CRISPR-aided genome editing in embryos:  
580 Screening, genotyping and quality control. *Methods* **121-122**, 68-76,  
581 doi:10.1016/j.ymeth.2017.03.016 (2017).
- 582 47 Harris, C. R. *et al.* Array programming with NumPy. *Nature* **585**, 357-362,  
583 doi:10.1038/s41586-020-2649-2 (2020).
- 584 48 McKinney, W. in *9th Python in Science Conference*. (eds S. van der Walt & J. Millman) 50-61.
- 585 49 Wilcoxon, F. Individual comparisons by ranking methods. *Biometrics Bulletin* **1**, 80-83,  
586 doi:10.2307/3001968 (1945).

- 587 50 Kruskal, W. H. & Wallis, W. A. Use of Ranks in One-Criterion Variance Analysis. *Journal of*  
588 *the American Statistical Association* **47**, 583-621, doi:10.1080/01621459.1952.10483441  
589 (1952).
- 590 51 Pearson, K. X. On the criterion that a given system of deviations from the probable in the  
591 case of a correlated system of variables is such that it can be reasonably supposed to have  
592 arisen from random sampling. *The London, Edinburgh, and Dublin Philosophical Magazine*  
593 *and Journal of Science* **50**, 157-175, doi:10.1080/14786440009463897 (1900).
- 594 52 Holm, S. A Simple Sequentially Rejective Multiple Test Procedure. *Scandinavian Journal of*  
595 *Statistics* **6**, 65-70, doi:10.2307/4615733 (1979).
- 596 53 Team, R. C. in *R Foundation for Statistical Computing*, (2021).
- 597 54 Wickham, H. *ggplot2: Elegant Graphics for Data Analysis*. (Springer-Verlag, 2016).
- 598 55 Wickham, H. *et al.* Welcome to the Tidyverse. *The Journal of Open Source Software* **4**, 1686,  
599 doi:10.21105/joss.01686 (2019).
- 600 56 Fox, J. Effect Displays in R for Generalised Linear Models. *2003* **8**, 27,  
601 doi:10.18637/jss.v008.i15 (2003).
- 602 57 Fox, J. & Weisberg, S. *An R companion to applied regression*. Third edition edn, (SAGE,  
603 2019).
- 604

605 **[Author contributions]**

606 K.A.P., B.W., D.L., L.T., P.K., M-C. B., G.C., G.D., L.G., L.L., M.M., M.R., J.D.H., and L.M.J.N.  
607 designed alleles; D.L., E.R., P.K., A.C., G.C., B.D., G.D., M.G., L.G., L.L., K.L., I.L., M.M., S.A.M., and  
608 L.M.J.N. produced mouse lines or data; H.E. and P.M. developed software, databases and/or  
609 reporting tools; H.E., K.A.P., E.A., S.A.M., and L.M.J.N. analyzed data for the figures in the  
610 manuscript; B.W., D.L., L.T., P.K., M-C.B., D.A., A.B., R.B., S.B., A.C., M.D., F.D., L.G., K.L., I.L.,  
611 M.M., A-M. M., C.M., H.P., R.R.-S., R.S., W.S., D.M., S.W., J.K.W., J.A.W., S.A.M., J.D.H., and  
612 L.M.J.N. co-supervised research; H.E., E.A., and L.M.J.N. wrote the manuscript. All authors  
613 reviewed and had the opportunity to comment on and edit the manuscript before submission.

614

615 **[Acknowledgements]**

616 We thank all technical personnel at the IMPC production centres for their contributions. H.E.,  
617 E.A., M.G., L.L., C.M., and L.M.J.N. were supported by Ontario Genomics and Genome Canada  
618 OGI-051, OGI-090, OGI-137 and the Canada Foundation for Innovation. M-C.B. and Y.H. were  
619 supported by the Université de Strasbourg, the CNRS, the INSERM and the 'Investissements  
620 d'avenir' programs (ANR-10-IDEX-0002-02, ANR-10-LABX-0030-INRT and ANR-10-INBS-07  
621 PHENOMIN). A.C., G.C., M.M., L.T., and S.W. were supported by the Medical Research Council  
622 MC\_UP\_1502/3 International Mouse Phenotyping Consortium - building a functional catalogue  
623 of a mammalian genome. B.D., G.D., E.R., H.W.-J., D.A., A.B., R.R.-S., and W.S. were supported  
624 by the Wellcome Trust. P.M. and H.P. were supported by European Molecular Biology  
625 Laboratory core funding. P.K. and R.S. used services of the Czech Centre for Phenogenomics  
626 supported by the Czech Academy of Sciences RVO 68378050 and project LM2018126 Czech

627 Centre for Phenogenomics provided by Ministry of Education, Youth and Sports of the Czech  
628 Republic, LM2015040 Czech Centre for Phenogenomics by MEYS, CZ.1.05/2.1.00/19.0395  
629 Higher quality and capacity for transgenic models by MEYS and ERDF, CZ.1.05/1.1.00/02.0109  
630 Biotechnology and Biomedicine Centre of the Academy of Sciences and Charles University in  
631 Vestec (BIOCEV) by MEYS and ERDF, CZ.02.1.01/0.0/0.0/16\_013/0001789 Upgrade of the Czech  
632 Centre for Phenogenomics by MEYS and ESIF.  
633 Research reported in this publication was supported by the NIH Common Fund, the Office of  
634 The Director and the National Human Genomic Research Institute of the National Institutes of  
635 Health (U42OD011174 and UMIHG006348 supported A.C., G.C., F.D., I.L., M.M., J.S., L.T., S.W.,  
636 M.D., and J.D.H.; U42OD011175 and UM1OD023221 supported M.G., L.L., C.M., L.M.J.N., B.W.,  
637 J.A.W., M.R., and K.L.; U42OD011185 and UM1OD023222 supported L.G., K.P., R.B., J.K.W., and  
638 S.A.M.; UM1HG006370 supported P.M., A.-M.M., and H.P.). The content is solely the  
639 responsibility of the authors and does not necessarily represent the official views of the  
640 National Institutes of Health.

641

642 **International Mouse Phenotyping Consortium (IMPC)**

643 Shaheen Akhtar<sup>8</sup>, Alasdair J. Allan<sup>9</sup>, Susan Allen<sup>9</sup>, Philippe André<sup>11</sup>, Daniel Archer<sup>9</sup>, Sarah Atkins<sup>9</sup>,  
644 Ruth Avery<sup>9</sup>, Abdel Ayadi<sup>11</sup>, Daniel Barrett<sup>8</sup>, Tanya Beyetinova<sup>8</sup>, Toni Bell<sup>9</sup>, Melissa Berry<sup>3</sup>,  
645 Katharina Boroviak<sup>8</sup>, Joanna Bottomley<sup>8</sup>, Tim Brendler-Spaeth<sup>8</sup>, Ellen Brown<sup>8</sup>, Jonathan Burvill<sup>8</sup>,  
646 James Bussell<sup>8</sup>, Charis Cardeno<sup>4</sup>, Rebecca V. Carter<sup>9</sup>, Patricia Castellanos-Penton<sup>1,2</sup>, Skevoulla  
647 Christou<sup>9</sup>, Greg Clark<sup>1,2</sup>, Shannon Clarke<sup>1,2</sup>, James Cleak<sup>9</sup>, Ronnie Crawford<sup>8</sup>, Amie Creighton<sup>1,2</sup>,  
648 Maribelle Cruz<sup>1</sup>, Ozge Danisment<sup>1,2</sup>, Charlotte Davis<sup>9</sup>, Joanne Doran<sup>8</sup>, Valérie Erbs<sup>11</sup>, Qing Fan-

649 Lan<sup>1,2</sup>, Rachel Fell<sup>9</sup>, He Feng<sup>5</sup>, Jean-Victor Fougerolle<sup>11</sup>, Alex Fower<sup>9</sup>, Gemma Frake<sup>9</sup>, Martin D.  
650 Fray<sup>9</sup>, Antonella Galli<sup>8</sup>, David Gannon<sup>8</sup>, Wendy J. Gardiner<sup>9</sup>, Angelina Gaspero<sup>5</sup>, Diane Gleeson<sup>8</sup>,  
651 Chris Godbehere<sup>9</sup>, Evelyn Grau<sup>8</sup>, Mark Griffiths<sup>8</sup>, Nicola Griggs<sup>8</sup>, Kristin Grimsrud<sup>4</sup>, Sarah  
652 Hazeltine<sup>4</sup>, Marie Hutchison<sup>9</sup>, Catherine Ingle<sup>8</sup>, Vivek Iyer<sup>8</sup>, Kayla Jager<sup>4</sup>, Joanna Joeng<sup>1,2</sup>, Susan  
653 Kales<sup>3</sup>, Perminder Kaur<sup>4</sup>, Janet Kenyon<sup>9</sup>, Jana Kopkanova<sup>10</sup>, Christelle Kujath<sup>11</sup>, Helen Kundi<sup>8</sup>,  
654 Peter Kutny<sup>3</sup>, Valerie Laurin<sup>1,2</sup>, Sandrine Lejeay<sup>11</sup>, Christopher Lelliott<sup>8</sup>, Jorik Loeffler<sup>9</sup>, Romain  
655 Lorentz<sup>11</sup>, Christopher V. McCabe<sup>9</sup>, Elke Malzer<sup>9</sup>, Peter Matthews<sup>16</sup>, Ryea Maswood<sup>8</sup>, Matthew  
656 McKay<sup>3</sup>, Terrence Meehan<sup>16</sup>, David Melvin<sup>8</sup>, Alison Murphy<sup>8</sup>, Asif Nakhuda<sup>8</sup>, Amit Patel<sup>1</sup>, Ilya  
657 Paulavets<sup>8</sup>, Guillaume Pavlovic<sup>11</sup>, Ashley Pawelka<sup>5</sup>, Fran J. Pike<sup>9</sup>, Radka Platte<sup>8</sup>, Peter D. Price<sup>9</sup>,  
658 Kiran Rajaya<sup>5</sup>, Shalini Reddy<sup>8</sup>, Whitney Rich<sup>5</sup>, Barry Rosen<sup>8</sup>, Victoria Ross<sup>8</sup>, Mark Ruhe<sup>4</sup>, Luis  
659 Santos<sup>15</sup>, Laurence Schaeffer<sup>11</sup>, Alix Schwiening<sup>8</sup>, Mohammed Selloum<sup>11</sup>, Debarati Sethi<sup>8</sup>, Jan R.  
660 Sidiangco<sup>9</sup>, Caroline Sinclair<sup>8</sup>, Elodie Sins<sup>8</sup>, Gillian Sleep<sup>1,2</sup>, Tania Sorg<sup>11</sup>, Becky Starbuck<sup>9</sup>,  
661 Michelle Stewart<sup>9</sup>, Holly Swash<sup>9</sup>, Mark Thomas<sup>8</sup>, Sandra Tondat<sup>1</sup>, Rachel Urban<sup>3</sup>, Jana  
662 Urbanova<sup>8</sup>, Susan Varley<sup>9</sup>, Dominique Von Schiller<sup>8</sup>, Hannah Wardle-Jones<sup>8</sup>, Lauren Weavers<sup>8</sup>,  
663 Michael Woods<sup>8</sup>  
664



665 **Table 1.** Logistical regression model for GLT status between production attempts conditional on  
 666 experimental parameters

| Predictors           | Odds Ratio | CI        | p-value |
|----------------------|------------|-----------|---------|
| (Intercept)          | 1.18       | 0.96-1.47 | 0.136   |
| ΔDelivery method     | 0.74       | 0.45-1.21 | 0.222   |
| ΔDecrease no. guides | 1.88       | 0.92-4.07 | 0.092   |
| ΔIncrease no. guides | 0.86       | 0.37-2.03 | 0.731   |
| ΔGuide sequence      | 1.88       | 1.02-3.58 | 0.048   |
| ΔTarget exon         | 1.22       | 0.44-3.58 | 0.709   |

Observations: 498

667  
 668 **Table 2.** General linear model for successful founder production conditional on biological  
 669 factors annotated for a gene

| Variable             | Without Essentiality |                       | With Essentiality |                        |
|----------------------|----------------------|-----------------------|-------------------|------------------------|
|                      | Odds Ratio           | p-value               | Odds Ratio        | p-value                |
| (Intercept)          | 2.50                 | 2.0x10 <sup>-16</sup> | 2.52              | 2.22x10 <sup>-16</sup> |
| Essential            | NA                   | NA                    | 0.89              | 2.06x10 <sup>-11</sup> |
| Embryonic expression | 0.95                 | 0.011                 | 0.97              | 0.219                  |
| pLI score            | 0.97                 | 0.101                 | 0.97              | 0.183                  |
| o/e score            | 1.00                 | 0.987                 | 1.00              | 0.887                  |
| Chromosome position  | 1.01                 | 0.647                 | 1.01              | 0.653                  |
| Acetylated gene      | 0.98                 | 0.193                 | 0.99              | 0.450                  |
| Methylated gene      | 1.03                 | 0.137                 | 1.01              | 0.383                  |
| Gram positive stain  | 1.00                 | 0.938                 | 1.00              | 0.891                  |
| OMIM annotation      | 0.99                 | 0.412                 | 0.98              | 0.220                  |

Observations: 3209

670

671

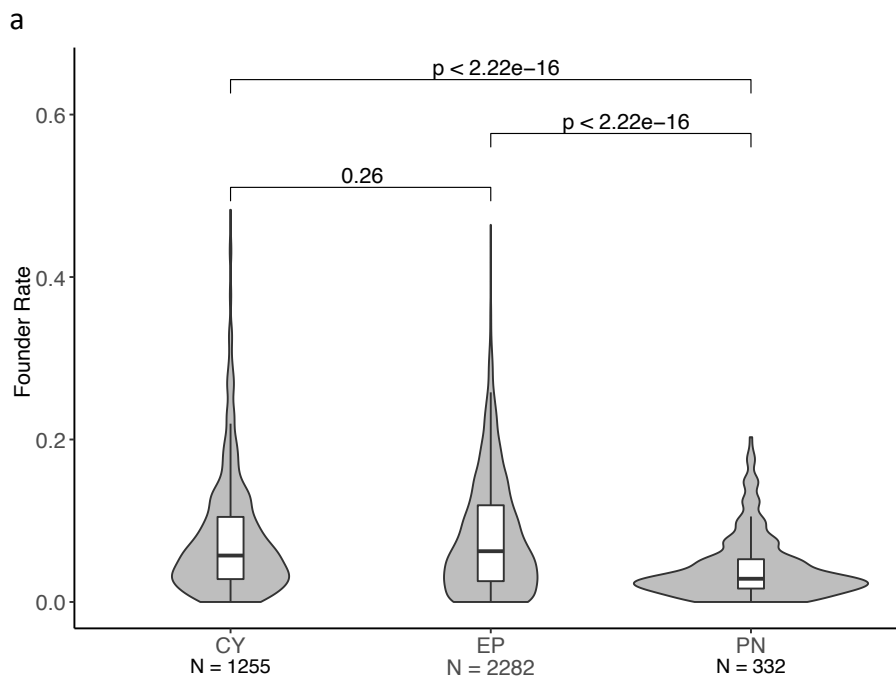

672

673

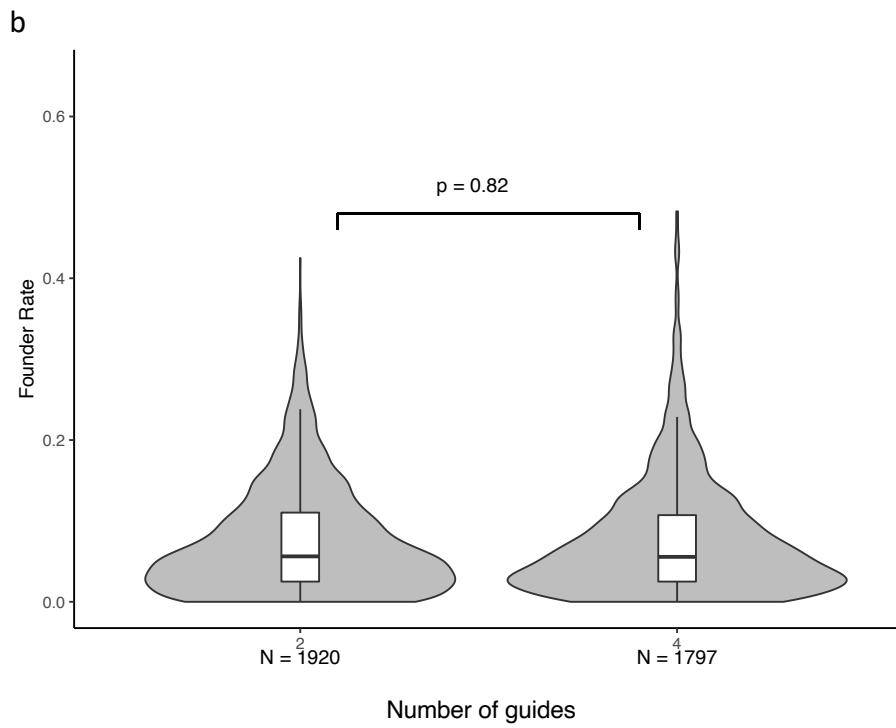

674

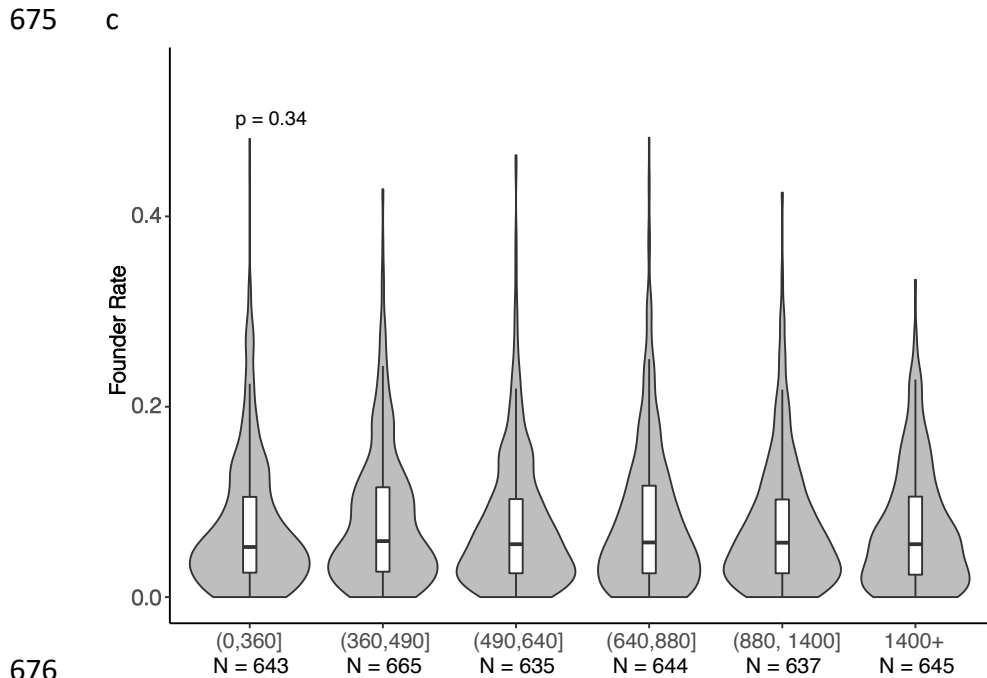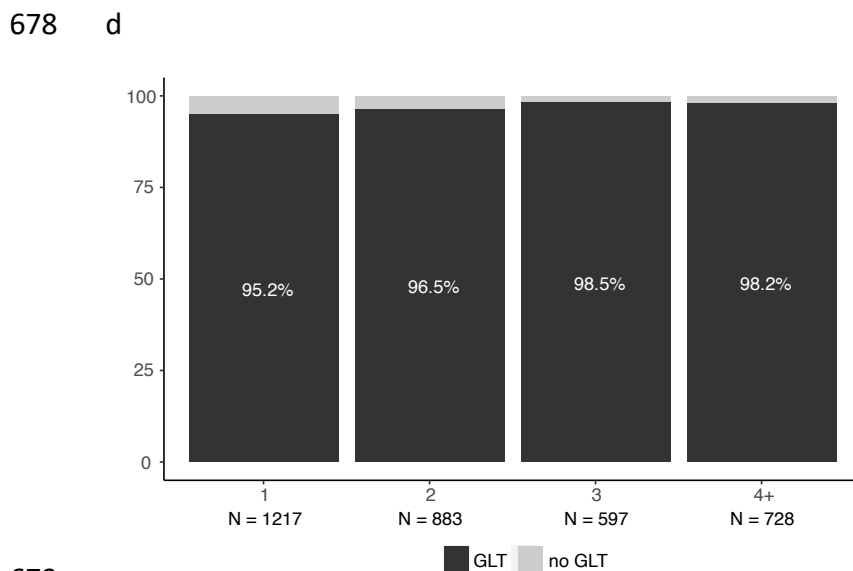

**Figure 1.** Experimental parameters affecting Cas9-mediated mutant mouse line production. **a.**

681 Founder rates from experiments with different methods of reagent delivery. CY, cytoplasmic

682 injection; EP, electroporation; PN, pronuclear injection. **b.** Founder rates from experiments

683 using two (2) or four (4) guide RNAs designed to produce deletion alleles. **c.** Founder rates from

684 experiments with Cas9 guide RNAs designed to delete different sizes of critical regions

685 (genomic DNA). Each bin has ~640 unique gene deletion attempts. **d.** Percentage of genes with  
686 GLT of the desired deletion allele after breeding one (1), two (2), three (3) or four or more (4+)  
687 founders. Pairwise comparison of GLT rates using the Holm method showed a significant  
688 difference only when breeding one founder was compared to breeding three or four founders  
689 ( $p = 0.004$  for both comparisons). Unique gene attempts are the first attempt with GLT of the  
690 desired allele or the last of a set of unsuccessful attempts for each gene. See materials and  
691 methods for a complete description of data filtering. GLT, germline transmission.  
692

693 a

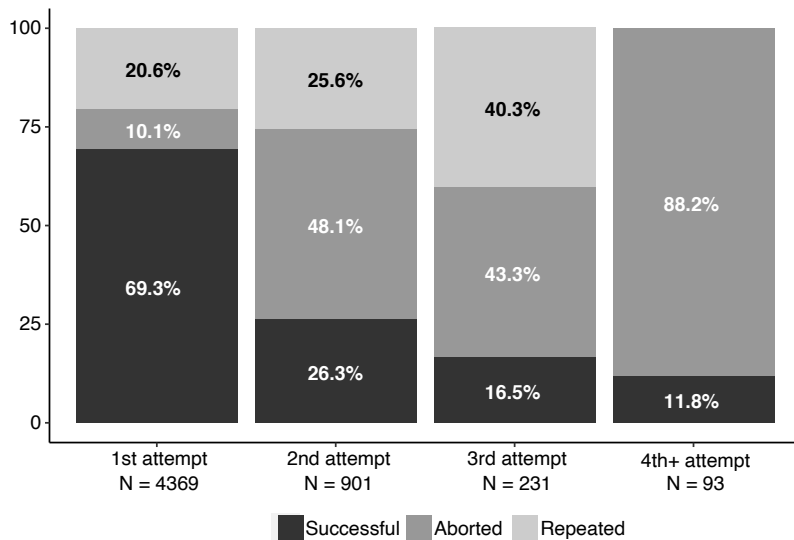

694 b  
695

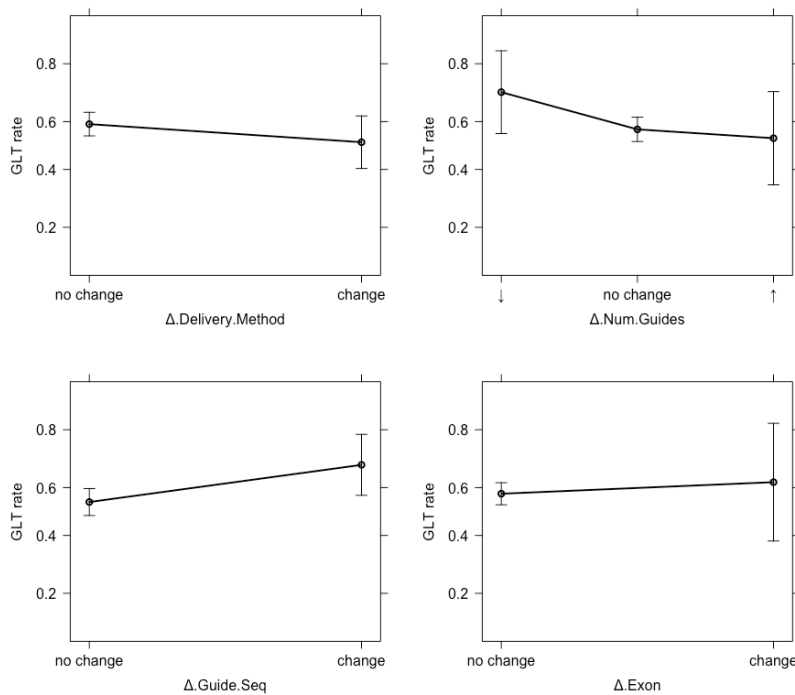

696 **Figure 2.** Percentage of genes with GLT of the desired allele. **a.** Percentage of genes with GLT of  
697 the desired deletion allele (successful), were abandoned with no additional attempts (aborted),  
698 or were repeated in subsequent experiments (repeated). **b.** Effect plots from the linear  
699 regression model. A negative slope indicates decreased GLT rates and a positive slope indicates  
700

701 increased GLT rates in subsequent attempts after the indicated parameter changed. See  
702 materials and methods for a complete description of data filtering.  
703

704

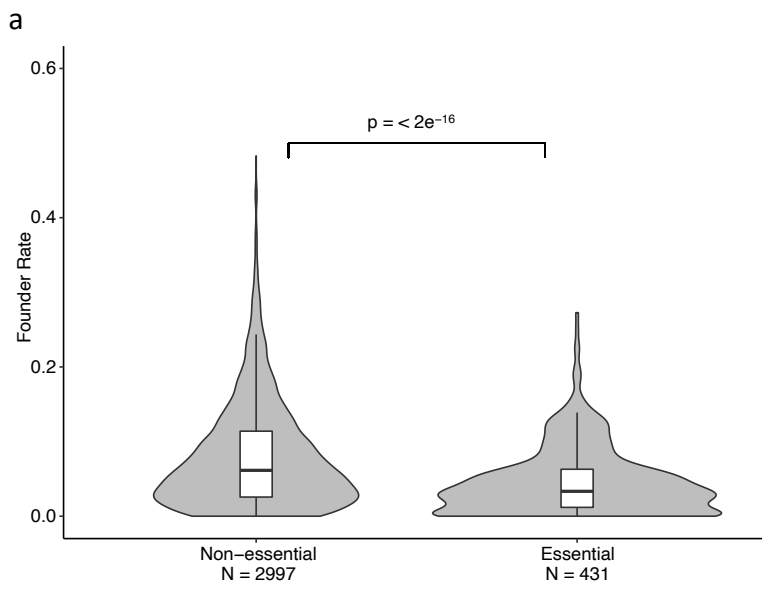

705

706

707

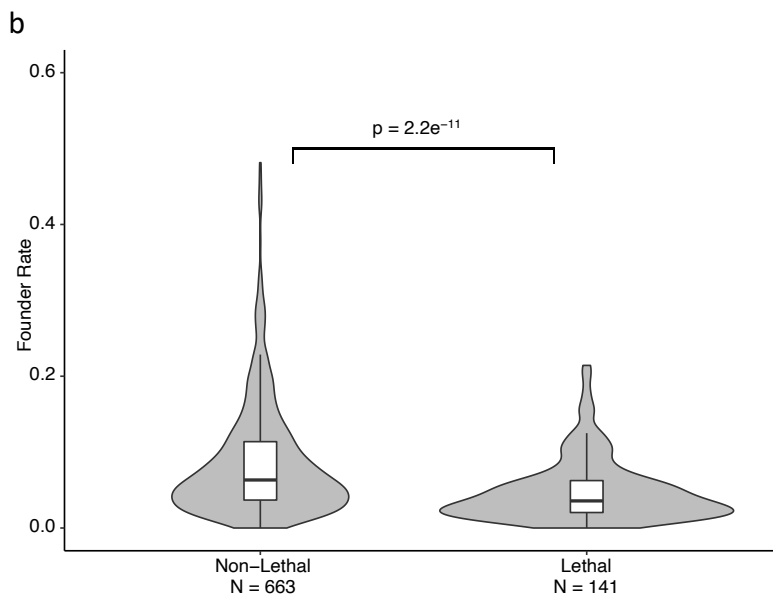

708

709

710 c

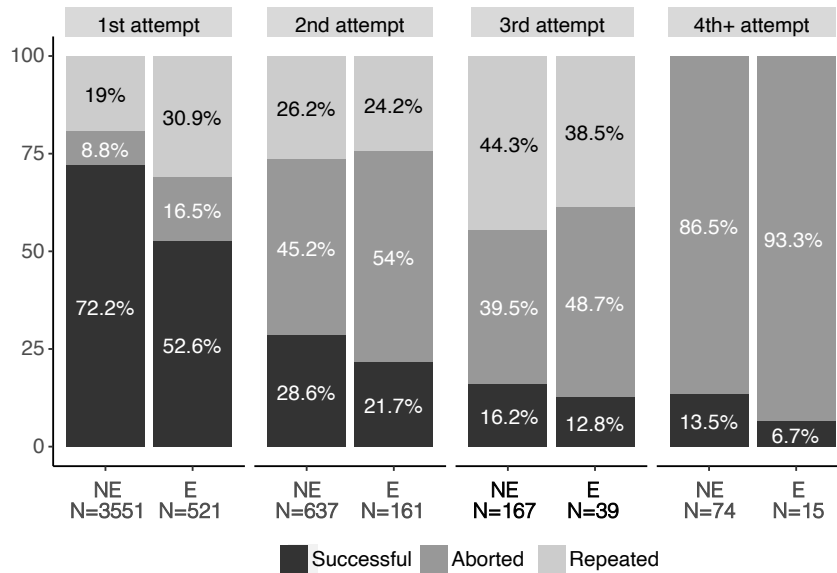

711  
712 d

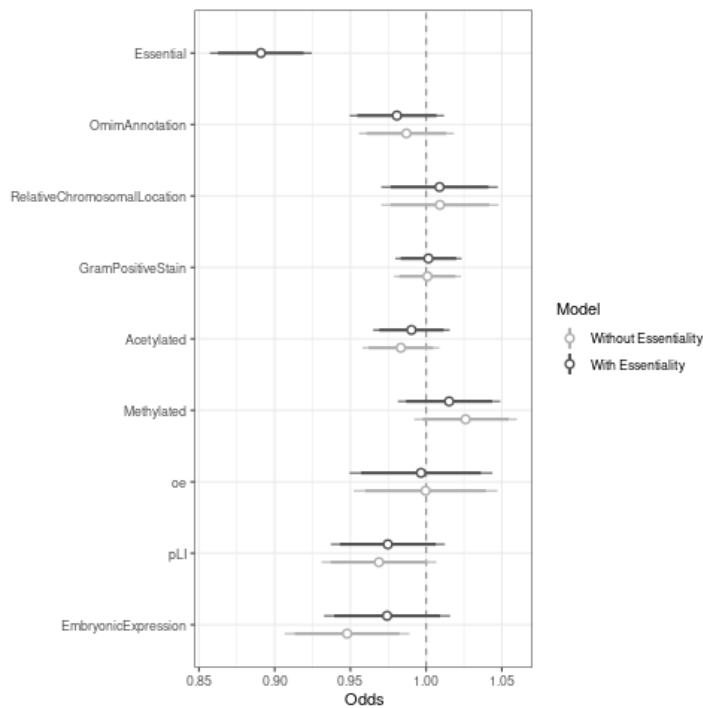

713 **Figure 3.** Effects of biological variables on founder and GLT rates for null allele production. **a.**

714 Founder rates of cellular non-essential and essential genes. **b.** Founder rates of homozygous

715 lethal and non-lethal genes. **c.** GLT of null alleles for essential (E) and non-essential (NE) genes

716 with multiple attempts to produce a null allele. **d.** General linear model (GLM) showing the



718 association of each variable with the success of the attempt to generate founders. An odds  
719 ratio below 1 is associated with a reduced probability of success, an odds ratio above 1 is  
720 associated with an improved probability of success, and an odds ratio of 1 is associated with no  
721 effect on success. **Table 2** has the odds ratios and p-values for each variable, with and without  
722 essentiality in the model, that assess the significance of the difference of the estimate from  
723 zero. **Supplementary Table 5** has the full model output. Each attempt represents a unique gene  
724 with the first attempt that successfully generated the desired allele or the last unsuccessful  
725 attempt for each gene used for analysis. See materials and methods for a complete description  
726 of data filtering.  
727

728

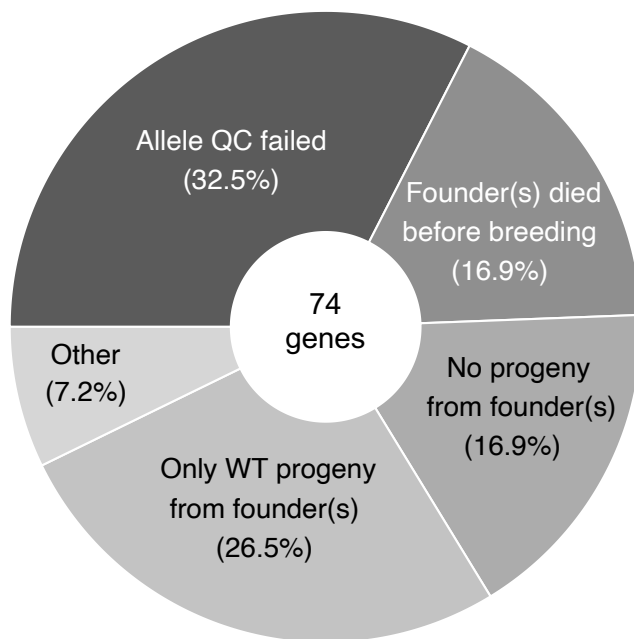

729

730 **Figure 4.** Summary of reasons founders failed to transmit a quality-controlled deletion allele to  
731 subsequent generations to establish a knock-out mouse line.
